# Supplementary material
Source: MDPI journal article supplement (https://www.mdpi.com/2073-4468/9/3/33)
Supplement: s1 [file s1]

**Supplemental Table S3.** List and short description of 460 human proteins that share hexapeptides with the 233 SARS-CoV-2 epitopes

| Shared 6-mer    | Human proteins sharing hexapeptides with SARS-CoV-2 epitopes                         |
|-----------------|--------------------------------------------------------------------------------------|
| LLDDDF          | 6PGD. 6-phosphogluconate dehydrogenase, decarboxylating                              |
| LALLLL          | A4. Amyloid-beta protein                                                             |
| VLPPLL          | AA1R. Adenosine receptor A1                                                          |
| LACFVL, VLPPLL  | AA2BR. Adenosine receptor A2b                                                        |
| LALLLL          | ABCA1. Phospholipid-transporting ATPase ABCA1                                        |
| ALALLL          | ABCA2. ATP-binding cassette sub-family A member 2                                    |
| LFLVLI          | ABCA4. Retinal-specific phospholipid-transporting ATPase ABCA4                       |
| SSRSSR          | ABI2. Abl interactor 2                                                               |
| AVLQSG          | ACES. Acetylcholinesterase                                                           |
| SSRSSS          | ACINU. Apoptotic chromatin condensation inducer in the nucleus                       |
| GAGAAL          | ACSS3. Acyl-CoA synthetase short-chain family member 3, mitochondrial                |
| LLSVLL, PRVFSA  | ADA33. Disintegrin and metalloproteinase domain-containing protein 33                |
| KQLSSN          | ADCY9. Adenylate cyclase type 9                                                      |
| TLTLAV          | AG10A. Dol-P-Glc:Glc(2)Man(9)GlcNAc(2)-PP-Dol alpha-1,2-glucosyltransferase          |
| TLTLAV          | AG10B. Putative Dol-P-Glc:Glc(2)Man(9)GlcNAc(2)-PP-Dol alpha-1,2-glucosyltransferase |
| FLLFLV          | AGRD2. Adhesion G-protein coupled receptor D2                                        |
| KVEAEV          | AHNK2. Protein AHNAK2                                                                |
| LNEVAK          | AIFM1. Apoptosis-inducing factor 1, mitochondrial                                    |
| ALALLLL, LALLLL | ALS. Insulin-like growth factor-binding protein complex acid labile subunit          |
| PPTEPK          | AMPH. Amphipysin                                                                     |
| TVATSR          | AMPQ. Aminopeptidase Q                                                               |
| SLLSVL          | AMRA1. Activating molecule in BECN1-regulated autophagy protein 1                    |
| IDLQEL          | ANC2. Anaphase-promoting complex subunit 2                                           |
| ALLLLD          | ANK3. Ankyrin-3                                                                      |
| ANLAAT          | ANLN. Anillin                                                                        |
| SLLSVL          | ANM7. Protein arginine N-methyltransferase 7                                         |
| VTPSGT          | ANR17. Ankyrin repeat domain-containing protein 17                                   |
| LLSVLL          | ANR27. Ankyrin repeat domain-containing protein 27                                   |
| LALLLL          | AP5Z1. AP-5 complex subunit zeta-1                                                   |
| SCCSCL          | AR13A. ADP-ribosylation factor-like protein 13A                                      |
| GSRGGS          | ARAF. Serine/threonine-protein kinase A-Raf                                          |
| RRNVAT          | ARAP2. Arf-GAP with Rho-GAP domain, ANK repeat and PH domain-containing protein 2    |
| GLPTQT          | ARAP3. Arf-GAP with Rho-GAP domain, ANK repeat and PH domain-containing protein 3    |
| SRSSSR          | ARGL1. Arginine and glutamate-rich protein 1                                         |
| LGASQR          | ARHGG. Rho guanine nucleotide exchange factor 16                                     |
| FPPTSF          | ARI5A. AT-rich interactive domain-containing protein 5A                              |
| QALNTL          | ARM12. Armadillo repeat-containing protein 12                                        |
| FLAFLI          | ATL1. ADAMTS-like protein 1                                                          |
| QLIRAA          | ATPF2. ATP synthase mitochondrial F1 complex assembly factor 2                       |
| LALLLL          | AUGN. Augurin                                                                        |
| LLSVLL          | BAP1. Ubiquitin carboxyl-terminal hydrolase BAP1                                     |
| SSRSSS          | BCLF1. Bcl-2-associated transcription factor 1                                       |
| SSRSSS          | BDP1. Transcription factor TFIIIB component B" homolog                               |
| LALLLL          | BIK. Bcl-2-interacting killer                                                        |
| LLDRLN          | BORC5. BLOC-1-related complex subunit 5                                              |
| TGRLQS          | BRD7. Bromodomain-containing protein 7                                               |
| FLAFLI          | BT3A1. Butyrophilin subfamily 3 member A1                                            |
| DSFKKE          | CAGE1. Cancer-associated gene 1 protein                                              |
| KEELDK          | CAN8. Calpain-8                                                                      |
| LLLDRL          | CAND2. Cullin-associated NEDD8-dissociated protein 2                                 |
| LALLLL          | CASQ1. Calsequestrin-1                                                               |
| LFLLPs          | CBLB. E3 ubiquitin-protein ligase CBL-B                                              |
| ALALLLL         | CBLN2. Cerebellin-2                                                                  |
| SRSSSR          | CC056. Putative uncharacterized protein C3orf56                                      |
| AAEIRA          | CCD17. Coiled-coil domain-containing protein 17                                      |
| TLPKGF          | CCD33. Coiled-coil domain-containing protein 33                                      |
| LSAGIF, SRSSSR  | CCG2. Voltage-dependent calcium channel gamma-2 subunit                              |
| LSAGIF          | CCG3. Voltage-dependent calcium channel gamma-3 subunit                              |
| SRSSSR          | CCG4. Voltage-dependent calcium channel gamma-4 subunit                              |
| LGAGCF          | CCG6. Voltage-dependent calcium channel gamma-6 subunit                              |
| SRSSSR          | CCG8. Voltage-dependent calcium channel gamma-8 subunit                              |
| GSRGGS          | CCM2L. Cerebral cavernous malformations 2 protein-like                               |

|                |                                                                          |
|----------------|--------------------------------------------------------------------------|
| SRSSSR         | CCNL2. Cyclin-L2                                                         |
| SSRSSS         | CCR8. C-C chemokine receptor type 8                                      |
| LVLSVN         | CD180. CD180 antigen                                                     |
| LALLLL         | CD320. CD320 antigen                                                     |
| ALALLL         | CD99. CD99 antigen                                                       |
| LVKQLS         | CDCA3. Cell division cycle-associated protein 3                          |
| LLSAGIF        | CE051. UPF0600 protein C5orf51                                           |
| ASSRSS         | CE350. Centrosome-associated protein 350                                 |
| EGSRGG         | CELR2. Cadherin EGF LAG seven-pass G-type receptor 2                     |
| LLNKEM         | CFA74. Cilia- and flagella-associated protein 74                         |
| SRGGSQ         | CFLAR. CASP8 and FADD-like apoptosis regulator                           |
| SSRSSS         | CHD9. Chromodomain-helicase-DNA-binding protein 9                        |
| SGINAS         | CIR1. Corepressor interacting with RBPJ 1                                |
| SSRSSSR        | CLASR. CLK4-associating serine/arginine rich protein                     |
| LALLLL         | CLM8. CMRF35-like molecule 8                                             |
| ASSRSS         | CLOCK. Circadian locomotor output cycles protein kaput                   |
| RGQGVPI        | CM029. Putative uncharacterized protein encoded by LINC00346             |
| LQLPQG         | CND1. Condensin complex subunit 1                                        |
| RVVVLS         | CP2F1. Cytochrome P450 2F1                                               |
| ALALLLL        | CP2S1. Cytochrome P450 2S1                                               |
| AEGSRG         | CPMD8. C3 and PZP-like alpha-2-macroglobulin domain-containing protein 8 |
| LGASQR         | CR018. Putative uncharacterized protein encoded by LINC00526             |
| LWAHGF         | CRBB3. Beta-crystallin B3                                                |
| AFLFL          | CRFR2. Corticotropin-releasing factor receptor 2                         |
| SRSSSR         | CRML. Protein cramped-like                                               |
| DDFVEI         | CRYA2. Alpha-crystallin A2 chain                                         |
| DDFVEI         | CRYAA. Alpha-crystallin A chain                                          |
| ASANLA         | CSK1I. Caskin-1                                                          |
| FLCLFL, TLACFV | CTXD1. Cortexin domain-containing 1                                      |
| LALLLL         | CXCL6. C-X-C motif chemokine 6                                           |
| APSASA         | CYTSA. Cytospin-A                                                        |
| LPPLLT         | D42E2. Putative short-chain dehydrogenase/reductase family 42E member 2  |
| SSRSSS         | DANCR. Putative uncharacterized protein DANCR                            |
| LFLVLI         | DB128. Beta-defensin 128                                                 |
| LDKVEA         | DESP. Desmoplakin                                                        |
| CLFLLP         | DHC24. Delta(24)-sterol reductase                                        |
| ASSRSS         | DICER. Endoribonuclease Dicer                                            |
| AALQIP         | DMTF1. Cyclin-D-binding Myb-like transcription factor 1                  |
| ALALLLL        | DNER. Delta and Notch-like epidermal growth factor-related receptor      |
| GLTGTG         | DNJB2. DnaJ homolog subfamily B member 2                                 |
| FPPTPE         | DPOE2. DNA polymerase epsilon subunit 2                                  |
| LLPSLA         | DRS7B. Dehydrogenase/reductase SDR family member 7B                      |
| PETNIL         | DUS19. Dual specificity protein phosphatase 19                           |
| SRSSSR         | DUS26. Dual specificity protein phosphatase 26                           |
| NVLYEN         | DYHC1. Cytoplasmic dynein 1 heavy chain 1                                |
| LALLLL         | EFNB3. Ephrin-B3                                                         |
| IVDTVS         | EFR3A. Protein EFR3 homolog A                                            |
| LVLSVN         | EGLN. Endoglin                                                           |
| SFSAST         | EGR1. Early growth response protein 1                                    |
| TSRTLS         | EIF3A. Eukaryotic translation initiation factor 3 subunit A              |
| FGAGAA         | ELN. Elastin                                                             |
| LSVLLS         | ELP6. Elongator complex protein 6                                        |
| KVEAEV         | EMIL3. EMILIN-3                                                          |
| EVAKNL         | ENTP4. Ectonucleoside triphosphate diphosphohydrolase 4                  |
| FAPSAS         | EP400. E1A-binding protein p400                                          |
| PSLATV         | EPHA2. Ephrin type-A receptor 2                                          |
| VKQLSS         | EPT1. Ethanolaminephosphotransferase 1                                   |
| TLPKGF         | ERC6L. DNA excision repair protein ERCC-6-like                           |
| GRLQSL         | ERCC1. DNA excision repair protein ERCC-1                                |
| RAAEIR         | ERG7. Lanosterol synthase                                                |
| TVLPPL         | F166C. Protein FAM166C                                                   |
| SLLSVL         | F189B. Protein FAM189B                                                   |
| FARTRS         | FANCM. Fanconi anemia group M protein                                    |
| LALLLL         | FAT1. Protocadherin Fat 1                                                |
| QRMLLE         | FBX30. F-box only protein 30                                             |
| SSRSSS         | FGD5. FYVE, RhoGEF and PH domain-containing protein 5                    |
| GLTVLPP        | FHOD3. FH1/FH2 domain-containing protein 3                               |
| PYRVVV         | FLNA. Filamin-A                                                          |

|                |                                                                                  |
|----------------|----------------------------------------------------------------------------------|
| LNTLTL         | FLOT1. Flotillin-1                                                               |
| LRANSA         | FNDC4. Fibronectin type III domain-containing protein 4                          |
| LLSVLL         | FOG1. Zinc finger protein ZFPM1                                                  |
| SCCSCL         | FRS3. Fibroblast growth factor receptor substrate 3                              |
| LDKYFKN        | FSTL1. Follistatin-related protein 1                                             |
| LALLLL         | FXYP4. FXYP domain-containing ion transport regulator 4                          |
| SALWEI         | GBF1. Golgi-specific brefeldin A-resistance guanine nucleotide exchange factor 1 |
| ALALLL         | GBP5. Guanylate-binding protein 5                                                |
| VLQAVG         | GCC2. GRIP and coiled-coil domain-containing protein 2                           |
| SFKEEL         | GCP5. Gamma-tubulin complex component 5                                          |
| RLQSLQ         | GHC1. Mitochondrial glutamate carrier 1                                          |
| LSVLLS         | GLCM1. Putative glycosylation-dependent cell adhesion molecule 1                 |
| RIMASL         | GLMN. Glomulin                                                                   |
| LALLLL         | GLP1R. Glucagon-like peptide 1 receptor                                          |
| LQELGK         | GLSK. Glutaminase kidney isoform, mitochondrial                                  |
| MCGGSL         | GLT14. Polypeptide N-acetylgalactosaminyltransferase 14                          |
| MCGGSL         | GLT16. Polypeptide N-acetylgalactosaminyltransferase 16                          |
| GLTVLP         | GLUT4. Solute carrier family 2, facilitated glucose transporter member 4         |
| NIQKEI         | GMEB1. Glucocorticoid modulatory element-binding protein 1                       |
| CLFLLP         | GNRR2. Putative gonadotropin-releasing hormone II receptor                       |
| ALQIPF         | GP146. Probable G-protein coupled receptor 146                                   |
| FFASFY         | GP151. G-protein coupled receptor 151                                            |
| LALLLL         | GP152. Probable G-protein coupled receptor 152                                   |
| TSCCSC         | GP155. Integral membrane protein GPR155                                          |
| QFAPSA         | GP176. G-protein coupled receptor 176                                            |
| ASFSAS         | GPR12. G-protein coupled receptor 12                                             |
| QPILLL         | GRAB. Granzyme B                                                                 |
| TSRTLS         | GRID1. Glutamate receptor ionotropic, delta-1                                    |
| LALLLL         | GRM2. Metabotropic glutamate receptor 2                                          |
| LPKEIT         | GSDMB. Gasdermin-B                                                               |
| LALLLL         | GT251. Procollagen galactosyltransferase 1                                       |
| RQLLFVV        | GTPBA. GTP-binding protein 10                                                    |
| QDVVNQ         | GTSF1. Gametocyte-specific factor 1                                              |
| IGAGICA        | HAVR2. Hepatitis A virus cellular receptor 2                                     |
| QNAQAL         | HDAC4. Histone deacetylase 4                                                     |
| QPILLL         | HDAC7. Histone deacetylase 7                                                     |
| QSGFRK         | HECD4. Probable E3 ubiquitin-protein ligase HECTD4                               |
| RVVVLS         | HELZ2. Helicase with zinc finger domain 2                                        |
| ALLADK         | HERC1. Probable E3 ubiquitin-protein ligase HERC1                                |
| APSASA         | HERC2. E3 ubiquitin-protein ligase HERC2                                         |
| AVLQSG         | HERC2. E3 ubiquitin-protein ligase HERC2                                         |
| AAEIRA         | HID1. Protein HID1                                                               |
| LLPSLA         | HNRDL. Heterogeneous nuclear ribonucleoprotein D-like                            |
| SSRSSSR        | HORN. Hornerin                                                                   |
| VLQAVG         | HPS6. Hermansky-Pudlak syndrome 6 protein                                        |
| LLPSLA         | HXD10. Homeobox protein Hox-D10                                                  |
| LQLGFS         | HXK3. Hexokinase-3                                                               |
| ATVVIG         | IFI27. Interferon alpha-inducible protein 27, mitochondrial                      |
| SLLSVL         | IKKE. Inhibitor of nuclear factor kappa-B kinase subunit epsilon                 |
| RRNVAT         | IMA5. Importin subunit alpha-5                                                   |
| LLFLVL         | INGR1. Interferon gamma receptor 1                                               |
| SLLSVL         | INGR2. Interferon gamma receptor 2                                               |
| FGAGAA         | IRS1. Insulin receptor substrate 1                                               |
| LALLLL         | ISK2. Serine protease inhibitor Kazal-type 2                                     |
| LALLLL         | ITB4. Integrin beta-4                                                            |
| LFAAETL        | ITK. Tyrosine-protein kinase ITK/TSK                                             |
| IGFLFL, LVKQLS | ITPR2. Inositol 1,4,5-trisphosphate receptor type 2                              |
| LLDDFV         | JAK2. Tyrosine-protein kinase JAK2                                               |
| VLQAVG         | JKAMP. JNK1/MAPK8-associated membrane protein                                    |
| WAHGFE         | JPH4. Juncophilin-4                                                              |
| QLSSNF         | K1210. Acrosomal protein KIAA1210                                                |
| RMLLEK         | K1755. Uncharacterized protein KIAA1755                                          |
| EELDKY         | K1C18. Keratin, type I cytoskeletal 18                                           |
| SFGGVS         | K1C24. Keratin, type I cytoskeletal 24                                           |
| GSRGGS         | K1C9. Keratin, type I cytoskeletal 9                                             |
| GSRGGS         | K22E. Keratin, type II cytoskeletal 2 epidermal                                  |
| LLSVLL         | KASH5. Protein KASH5                                                             |
| VLPPLL         | KCNK2. Potassium channel subfamily K member 2                                    |

|         |                                                                                                          |
|---------|----------------------------------------------------------------------------------------------------------|
| SRSSSR  | KCNN2. Small conductance Ca <sup>++</sup> -activated K <sup>+</sup> channel protein 2                    |
| QASSRS  | KIF12. Kinesin-like protein KIF12                                                                        |
| DTVSAL  | KIF22. Kinesin-like protein KIF22                                                                        |
| PTSFGP  | KIRR2. Kin of IRRE-like protein 2                                                                        |
| ANLAAT  | KISSR. KiSS-1 receptor                                                                                   |
| PSLATV  | KKCC2. Calcium/calmodulin-dependent protein kinase kinase 2                                              |
| TTLPVN  | KLF5. Krueppel-like factor 5                                                                             |
| LGLPTQ  | KLK2. Kallikrein-2                                                                                       |
| LLSVLL  | KLRG1. Killer cell lectin-like receptor subfamily G member 1                                             |
| SSRSSS  | KMT2A. Histone-lysine N-methyltransferase 2A                                                             |
| LQELGK  | KNL1. Kinetochore scaffold 1                                                                             |
| LFLVLI  | KPBB. Phosphorylase b kinase regulatory subunit beta                                                     |
| AAETLK  | KPRB. Phosphoribosyl pyrophosphate synthase-associated protein 2                                         |
| CTVNAL  | KRT37. Keratin, type I cuticular Ha7                                                                     |
| CTVNAL  | KRT38. Keratin, type I cuticular Ha8                                                                     |
| SFSAST  | KV108. Immunoglobulin kappa variable 1-8                                                                 |
| DLQELG  | L1CAM. Neural cell adhesion molecule L1                                                                  |
| GTTVLL  | LAMP1. Lysosome-associated membrane glycoprotein 1                                                       |
| SRSSSR  | LC7L2. Putative RNA-binding protein Luc7-like 2                                                          |
| SRSSSR  | LENG8. Leukocyte receptor cluster member 8                                                               |
| QPILLL  | LIGO1. Leucine-rich repeat and immunoglobulin-like domain-containing nogo receptor-interacting protein 1 |
| ALALLL  | LIPA1. Liprin-alpha-1                                                                                    |
| KLGAQ   | LIPR2. Pancreatic lipase-related protein 2                                                               |
| VLPPLL  | LMTK1. Serine/threonine-protein kinase LMTK1                                                             |
| VVNIQK  | LNK1. E3 ubiquitin-protein ligase LNK                                                                    |
| VDFCGK  | LRC58. Leucine-rich repeat-containing protein 58                                                         |
| LNTLTL  | LRFN1. Leucine-rich repeat and fibronectin type III domain-containing protein 1                          |
| SFSAST  | LRT3. Leucine-rich repeat, immunoglobulin-like domain and transmembrane domain-containing protein 3      |
| LALLLL  | LRP8. Low-density lipoprotein receptor-related protein 8                                                 |
| PKEITV  | LRR7. Leucine-rich repeat-containing protein 7                                                           |
| LALLLL  | LTBP3. Latent-transforming growth factor beta-binding protein 3                                          |
| SSRSSS  | M3K7. Mitogen-activated protein kinase kinase kinase 7                                                   |
| LAFLLF  | MA1B1. Endoplasmic reticulum mannosyl-oligosaccharide 1,2-alpha-mannosidase                              |
| VTPSGT  | MANS1. MANS domain-containing protein 1                                                                  |
| SSRSSS  | MARHA. Probable E3 ubiquitin-protein ligase MARCHF10                                                     |
| SSRSSS  | MARHB. E3 ubiquitin-protein ligase MARCHF11                                                              |
| LLQYGS  | MATN2. Matrilin-2                                                                                        |
| VLSQGF  | MBOA5. Lysophospholipid acyltransferase 5                                                                |
| TGTLIV  | MCM6. DNA replication licensing factor MCM6                                                              |
| LLDDDF  | MCU. Calcium uniporter protein, mitochondrial                                                            |
| KQLSSN  | MD12L. Mediator of RNA polymerase II transcription subunit 12-like protein                               |
| FLNRFT  | MDN1. Midasin                                                                                            |
| QALNTL  | MED1. Mediator of RNA polymerase II transcription subunit 1                                              |
| LASFAS  | MGA. Maltase-glucoamylase, intestinal                                                                    |
| IRQEEV  | MLP3C. Microtubule-associated proteins 1A/1B light chain 3C                                              |
| LALLLL  | MMP25. Matrix metalloproteinase-25                                                                       |
| SSVLND  | MPP8. M-phase phosphoprotein 8                                                                           |
| SRGGSQ  | MRE11. Double-strand break repair protein MRE11                                                          |
| LPPLLT  | MROH9. Maestro heat-like repeat-containing protein family member 9                                       |
| LIIFWF  | MRP3. Canalicular multispecific organic anion transporter 2                                              |
| LSVLLS  | MTMR3. Myotubularin-related protein 3                                                                    |
| PCSFGG  | MUC19. Mucin-19                                                                                          |
| LFLPLS  | MUCEN. Endomucin                                                                                         |
| LLLDRL  | MUSK. Muscle, skeletal receptor tyrosine-protein kinase                                                  |
| ALALLL  | MXRA7. Matrix-remodeling-associated protein 7                                                            |
| LIRAAEI | MY18A. Unconventional myosin-XVIIIa                                                                      |
| LLSVLL  | MYADM. Myeloid-associated differentiation marker                                                         |
| FLLFLV  | MYCT1. Myc target protein 1                                                                              |
| AAETLK  | MYH3. Myosin-3                                                                                           |
| SASAFF  | MYO15. Unconventional myosin-XV                                                                          |
| QRMLLEK | MYO5C. Unconventional myosin-Vc                                                                          |
| LLPSLA  | MYO9B. Unconventional myosin-IXb                                                                         |
| RGGSQA  | MYOZ1. Myozenin-1                                                                                        |
| KEELDK  | NAPEP. N-acyl-phosphatidylethanolamine-hydrolyzing phospholipase D                                       |
| ALALLL  | NAT14. N-acetyltransferase 14                                                                            |
| ALALLL  | NAT8B. Putative N-acetyltransferase 8B                                                                   |

|                 |                                                                                       |
|-----------------|---------------------------------------------------------------------------------------|
| TGRLQSL         | NAV3. Neuron navigator 3                                                              |
| LIMLIIF         | NCKX2. Sodium/potassium/calcium exchanger 2                                           |
| PSLATV          | NCOA6. Nuclear receptor coactivator 6                                                 |
| SGINAS          | NEBU. Nebulin                                                                         |
| YLDAYN          | NIPS1. Protein NipSnap homolog 1                                                      |
| LLPSLA          | NKD1. Protein naked cuticle homolog 1                                                 |
| SSRSSS          | NKTR. NK-tumor recognition protein                                                    |
| GMEVTP          | NKX22. Homeobox protein Nkx-2.2                                                       |
| NDILSR          | NKX61. Homeobox protein Nkx-6.1                                                       |
| ASSRSS          | NPAS2. Neuronal PAS domain-containing protein 2                                       |
| AGIFGA          | NPT3. Sodium-dependent phosphate transport protein 3                                  |
| LALLLL          | NPW. Neuropeptide W                                                                   |
| SSRSSS          | NRG2. Pro-neuregulin-2, membrane-bound isoform                                        |
| FGAISS          | NTCP7. Sodium/bile acid cotransporter 7                                               |
| LFLLP           | NTF4. Neurotrophin-4                                                                  |
| SANLAA          | NTRK2. BDNF/NT-3 growth factors receptor                                              |
| SVLLSM          | O51G1. Olfactory receptor 51G1                                                        |
| SVLLSM          | O51G2. Olfactory receptor 51G2                                                        |
| RMLLEK          | O51J1. Olfactory receptor 51J1                                                        |
| IFWFSL          | O52N5. Olfactory receptor 52N5                                                        |
| AILAS           | OR2BB. Olfactory receptor 2B11                                                        |
| AILAS           | OR2W1. Olfactory receptor 2W1                                                         |
| IIFWFSL         | OR7D4. Olfactory receptor 7D4                                                         |
| SLLSVL          | ORML1. ORM1-like protein 1                                                            |
| SLLSVLL         | ORML2. ORM1-like protein 2                                                            |
| SSRSSSR         | OSB10. Oxysterol-binding protein-related protein 10                                   |
| LITGRL          | OTOG. Otogelin                                                                        |
| LLSVLL          | OTOP2. Proton channel OTOP2                                                           |
| VLNDIL          | OVGP1. Oviduct-specific glycoprotein                                                  |
| LLFLVL          | P210L. Nuclear pore membrane glycoprotein 210-like                                    |
| LQDVVN          | P2R3B. Serine/threonine-protein phosphatase 2A regulatory subunit B" subunit beta     |
| WPVTLA          | P2RX2. P2X purinoceptor 2                                                             |
| GALNTP          | PACS2. Phosphofurin acidic cluster sorting protein 2                                  |
| GFIAGL          | PAOX. Peroxisomal N(1)-acetyl-spermine/spermidine oxidase                             |
| VLLKEP          | PAPOB. Poly(A) polymerase beta                                                        |
| GTTVLL          | PAR14. Protein mono-ADP-ribosyltransferase PARP14                                     |
| VLQLPQ          | PCD12. Protocadherin-12                                                               |
| LLSVLL          | PCDB7. Protocadherin beta-7                                                           |
| LLSVLL          | PCDB9. Protocadherin beta-9                                                           |
| LLSVLL          | PCDBA. Protocadherin beta-10                                                          |
| LALLLL          | PCDH1. Protocadherin-1                                                                |
| LALLLL          | PF4V. Platelet factor 4 variant                                                       |
| TVLLKE          | PGH2. Prostaglandin G/H synthase 2                                                    |
| LFLLP           | PGLT1. Protein O-glucosyltransferase 1                                                |
| RTLSYY          | PHLB1. Pleckstrin homology-like domain family B member 1                              |
| LVKQLS, VKQLSS  | PIAS1. E3 SUMO-protein ligase PIAS1                                                   |
| SSRSSS          | PININ. Pinin                                                                          |
| AILAS           | PK1L2. Polycystic kidney disease protein 1-like 2                                     |
| IKDLPK          | PK3CG. Phosphatidylinositol 4,5-bisphosphate 3-kinase catalytic subunit gamma isoform |
| LQELGK, SSRSSSR | PKHG2. Pleckstrin homology domain-containing family G member 2                        |
| RLQSLQ          | PKHH3. Pleckstrin homology domain-containing family H member 3                        |
| SSRSSS          | PNISR. Arginine/serine-rich protein PNISR                                             |
| QQGQTV          | POGZ. Pogo transposable element with ZNF domain                                       |
| LVKQLS          | PP1RA. Serine/threonine-protein phosphatase 1 regulatory subunit 10                   |
| QGTTLP          | PP2D1. Protein phosphatase 2C-like domain-containing protein 1                        |
| LLPSLA          | PPA5. Tartrate-resistant acid phosphatase type 5                                      |
| KVEAEV          | PRAX. Periaxin                                                                        |
| SFGGVS          | PRC2B. Protein PRRC2B                                                                 |
| LGDISG          | PRC2C. Protein PRRC2C                                                                 |
| SRSSSR          | PRGC1. Peroxisome proliferator-activated receptor gamma coactivator 1-alpha           |
| VDGVPF          | PRPH2. Peripherin-2                                                                   |
| AEGSRG          | PRS56. Serine protease 56                                                             |
| GLIAIV          | PRT1B. Proline rich transmembrane protein 1B                                          |
| DIKDLP          | PSD13. 26S proteasome non-ATPase regulatory subunit 13                                |
| TLACFV          | PSN2. Presenilin-2                                                                    |
| FLNGSC          | PTH1R. Parathyroid hormone/parathyroid hormone-related peptide receptor               |
| LLSVLL          | PTK7. Inactive tyrosine-protein kinase 7                                              |

|                             |                                                                     |
|-----------------------------|---------------------------------------------------------------------|
| EITVAT                      | PXDC2. Plexin domain-containing protein 2                           |
| ALALLL                      | PXL2A. Peroxiredoxin-like 2A                                        |
| LLLDRL                      | PXMP2. Peroxisomal membrane protein 2                               |
| SRGGSQA,<br>SRTLSTY, SSRSSS | RADIL. Ras-associating and dilute domain-containing protein         |
| DYDYR                       | RALY. RNA-binding protein Raly                                      |
| DYDYR                       | RALYL. RNA-binding Raly-like protein                                |
| SRSSSR                      | RBM15. RNA-binding protein 15                                       |
| GVTQNV                      | RESF1. Retroelement silencing factor 1                              |
| EGSRGG                      | RIMB1. Peripheral-type benzodiazepine receptor-associated protein 1 |
| QASSRS                      | RIMS1. Regulating synaptic membrane exocytosis protein 1            |
| LAFLLF                      | RM38. 39S ribosomal protein L38, mitochondrial                      |
| LCLFLL                      | RN145. RING finger protein 145                                      |
| GAGAAL                      | RPRML. Reprimo-like protein                                         |
| SPKLFI                      | RSPO1. R-spondin-1                                                  |
| LTVLPP                      | RSU1. Ras suppressor protein 1                                      |
| RILGAG                      | RT02. 28S ribosomal protein S2, mitochondrial                       |
| GTTVLL                      | RT22. 28S ribosomal protein S22, mitochondrial                      |
| LALLLL                      | RTN2. Reticulon-2                                                   |
| LFLFPS                      | RTTN. Rotatin                                                       |
| LGFSTG                      | RXRA. Retinoic acid receptor RXR-alpha                              |
| AGIFGA                      | S12A3. Solute carrier family 12 member 3                            |
| SSRSSSR                     | S12A6. Solute carrier family 12 member 6                            |
| AGIFGA                      | S17A4. Probable small intestine urate exporter                      |
| ILGAGC                      | S22AV. Putative solute carrier family 22 member 31                  |
| VLQLPQG                     | S26A5. Prestin                                                      |
| LALLLL                      | S27A5. Bile acyl-CoA synthetase                                     |
| LVIGAV                      | S35A2. UDP-galactose translocator                                   |
| LALLLL                      | S35A4. Probable UDP-sugar transporter protein SLC35A4               |
| LLFLVL                      | S38A1. Sodium-coupled neutral amino acid transporter 1              |
| ILGTVS                      | S38A9. Sodium-coupled neutral amino acid transporter 9              |
| ALALLL                      | SC31B. Protein transport protein Sec31B                             |
| ATEGAL                      | SCND2. Putative SCAN domain-containing protein SCAND2P              |
| SVLNDI                      | SCND3. SCAN domain-containing protein 3                             |
| LDDFVE                      | SCR2. Lysosome membrane protein 2                                   |
| VIGFLF                      | SDC2. Syndecan-2                                                    |
| PTEPKK                      | SDC4. Syndecan-4                                                    |
| GAGCFV                      | SEC62. Translocation protein SEC62                                  |
| LALLLL                      | SELM. Selenoprotein M                                               |
| ALALLL                      | SFRP5. Secreted frizzled-related protein 5                          |
| ALNTPK                      | SIIL3. Signal-induced proliferation-associated 1-like protein 3     |
| FLAFLF                      | SIM28. Small integral membrane protein 28                           |
| VNQNAQ                      | SIX4. Homeobox protein SIX4                                         |
| LLKEPC                      | SLAP2. Src-like-adaptor 2                                           |
| PETNIL                      | SLF2. SMC5-SMC6 complex localization factor protein 2               |
| QASSRS                      | SMAD9. Mothers against decapentaplegic homolog 9                    |
| KVEAEV                      | SMC4. Structural maintenance of chromosomes protein 4               |
| TPSGTW                      | SMG7. Protein SMG7                                                  |
| AEGSRGG                     | SNPC3. snRNA-activating protein complex subunit 3                   |
| QQLIRA                      | SNX13. Sorting nexin-13                                             |
| GVYDYL                      | SNX14. Sorting nexin-14                                             |
| GSRGGS                      | SNX18. Sorting nexin-18                                             |
| ALLADK                      | SNX8. Sorting nexin-8                                               |
| ILGTVS                      | SO1C1. Solute carrier organic anion transporter family member 1C1   |
| KLASQ                       | SO2A1. Solute carrier organic anion transporter family member 2A1   |
| GAISSV                      | SOX17. Transcription factor SOX-17                                  |
| APSASA                      | SOX8. Transcription factor SOX-8                                    |
| LSVLLS                      | SPAG4. Sperm-associated antigen 4 protein                           |
| VANYQK                      | SPD2B. SH3 and PX domain-containing protein 2B                      |
| SRSSSR                      | SREK1. Splicing regulatory glutamine/lysine-rich protein 1          |
| SRSSSR                      | SRSF6. Serine/arginine-rich splicing factor 6                       |
| GAGAAL                      | SSH1. Protein phosphatase Slingshot homolog 1                       |
| ALALLLL,<br>LALLLL          | SSRD. Translocon-associated protein subunit delta                   |
| IPRRNV                      | STAB1. Stabilin-1                                                   |
| IVDTVSA                     | SYAM. Alanine--tRNA ligase, mitochondrial                           |
| LLSAGI                      | SYNE1. Nesprin-1                                                    |
| FLLFLV                      | T2R38. Taste receptor type 2 member 38                              |

|                |                                                                                 |
|----------------|---------------------------------------------------------------------------------|
| KEELDK         | TAF2. Transcription initiation factor TFIID subunit 2                           |
| IKDLPK         | TBC9B. TBC1 domain family member 9B                                             |
| SRSSSR         | TEX33. Testis-expressed protein 33                                              |
| RASANL         | TF3C1. General transcription factor 3C polypeptide 1                            |
| NASVVNI        | THADA. Thyroid adenoma-associated protein                                       |
| LALLLL         | TIG1. Retinoic acid receptor responder protein 1                                |
| ALLLLD         | TIGD7. Tigger transposable element-derived protein 7                            |
| LALLLL         | TKN4. Tachykinin-4                                                              |
| LALLLL         | TM115. Transmembrane protein 115                                                |
| LFLVLI         | TM218. Transmembrane protein 218                                                |
| LLSVLL         | TM74B. Transmembrane protein 74B                                                |
| LALLLL         | TMED7. Transmembrane emp24 domain-containing protein 7                          |
| LALLLL         | TMEDA. Transmembrane emp24 domain-containing protein 10                         |
| GTTVLL         | TNR1A. Tumor necrosis factor receptor superfamily member 1A                     |
| ALALLL         | TOR1B. Torsin-1B                                                                |
| SSRSSS         | TR150. Thyroid hormone receptor-associated protein 3                            |
| AGAALQ         | TRBM. Thrombomodulin                                                            |
| ALALLL         | TRGV8. T cell receptor gamma variable 8                                         |
| SFKEEL         | TRI35. Tripartite motif-containing protein 35                                   |
| QRMLLE         | TRI66. Tripartite motif-containing protein 66                                   |
| LLSVLL         | TRIM3. Tripartite motif-containing protein 3                                    |
| LNEVAK         | TRIM8. E3 ubiquitin-protein ligase TRIM8                                        |
| EELDKY         | TRIPB. Thyroid receptor-interacting protein 11                                  |
| FAAETL         | TRM11. tRNA (guanine(10)-N2)-methyltransferase homolog                          |
| IIFWFS         | TRPM6. Transient receptor potential cation channel subfamily M member 6         |
| ALALLLL        | TSP3. Thrombospondin-3                                                          |
| DSFKEE         | TSTD2. Thiosulfate sulfurtransferase/rhodanese-like domain-containing protein 2 |
| LVKQLS         | TTC7B. Tetratricopeptide repeat protein 7B                                      |
| TVATSR         | TX261. Protein TEX261                                                           |
| QALNTL         | TXLNG. Gamma-taxilin                                                            |
| QALNTL         | TXNG2. Putative gamma-taxilin 2                                                 |
| TSFGPL         | U2AF2. Splicing factor U2AF 65 kDa subunit                                      |
| EVAKNL         | UBA7. Ubiquitin-like modifier-activating enzyme 7                               |
| ALALLL. FLFLPS | UBP34. Ubiquitin carboxyl-terminal hydrolase 34                                 |
| ISSVLN         | UGPA. UTP--glucose-1-phosphate uridylyltransferase                              |
| TLSYYK         | URP2. Fermitin family homolog 3                                                 |
| FLLPSL         | VIAAT. Vesicular inhibitory amino acid transporter                              |
| LQELGK         | VIR. Protein virilizer homolog                                                  |
| QSGFRK         | VMA5A. von Willebrand factor A domain-containing protein 5A                     |
| LGFIAG         | VPP4. V-type proton ATPase 116 kDa subunit a isoform 4                          |
| ESLIDL         | VPS50. Syndetin                                                                 |
| SFNPET         | WDFY2. WD repeat and FYVE domain-containing protein 2                           |
| LDDFVEI        | WFS1. Wolframin                                                                 |
| SSRSSS         | WNK1. Serine/threonine-protein kinase WNK1                                      |
| LLLDRL         | XPOT. Exportin-T                                                                |
| PKEITV         | YETS2. YEATS domain-containing protein 2                                        |
| ESLIDL         | ZBED5. Zinc finger BED domain-containing protein 5                              |
| GSRGGS         | ZC3H4. Zinc finger CCCH domain-containing protein 4                             |
| SSRSSSR        | ZCH18. Zinc finger CCCH domain-containing protein 18                            |
| EGSRGG         | ZCHC2. Zinc finger CCHC domain-containing protein 2                             |
| VVVLFS         | ZDHC4. Probable palmitoyltransferase ZDHHC4                                     |
| SSNFGA         | ZKSC2. Zinc finger protein with KRAB and SCAN domains 2                         |
| AQFAPS         | ZMIZ2. Zinc finger MIZ domain-containing protein 2                              |
| YMNSQG         | ZN284. Zinc finger protein 284                                                  |
| ILGTVS         | ZN300. Zinc finger protein 300                                                  |
| LTGTGV         | ZN446. Zinc finger protein 446                                                  |
| GSRGGS         | ZN703. Zinc finger protein 703                                                  |
| LLPSLA         | ZNF18. Zinc finger protein 18                                                   |
| SVVNIQ         | ZNF45. Zinc finger protein 45                                                   |
| SLLSVL         | ZNT5. Zinc transporter 5                                                        |
| LPRVFS         | ZP2. Zona pellucida sperm-binding protein 2                                     |
| LLSVLL         | ZPI. Protein Z-dependent protease inhibitor                                     |
| SSRSSSR        | ZRAB2. Zinc finger Ran-binding domain-containing protein 2                      |
