# Supplementary material
Source: MDPI journal article supplement (https://www.mdpi.com/2073-4468/9/3/33)
Supplement: s1 [file s1]

**Supplemental Table S1.** SARS-CoV-2 immunome consisting of 233 immunopositive linear epitopes, assembled from IEDB [16], described by Ahmed et al. [17], and listed according to IEDB ID number. Epitope experimental details and references are available at [www.iedb.org](http://www.iedb.org).

---

956; 999; 1220; 1221; 1349; 1350; 1946; 2027; 2431; 2682; 2801; 2802; 2855; 2998; 3589; 3810; 3939; 3956; 3982; 4307; 4321; 4936; 5149; 5150; 5209; 5447; 5908; 6184; 6668; 7289; 9006; 10112; 16156; 16498; 16499; 16500; 16537; 16632; 16716; 16717; 16718; 16737; 16743; 16779; 16786; 16820; 16953; 16954; 16972; 16973; 16974; 17341; 17354; 17385; 17657; 18103; 18133; 18422; 18423; 18514; 20907; 21347; 21996; 22144; 22322; 22856; 22916; 23200; 23215; 23293; 23436; 24313; 24466; 25542; 25571; 25662; 26198; 26710; 26759; 26973; 27078; 27083; 27089; 27182; 27516; 28050; 28199; 28464; 28511; 29127; 29237; 31833; 31846; 32060; 32183; 32240; 32390; 32976; 33667; 33668; 34763; 34851; 35205; 35671; 35797; 35912; 36075; 36103; 36477; 36481; 36724; 37144; 37279; 37280; 37281; 37468; 37473; 37515; 37544; 37583; 37724; 37766; 38043; 38353; 38831; 38855; 38874; 38881; 38990; 39003; 39576; 40459; 40677; 40685; 41962; 42093; 42128; 42260; 42648; 42873; 42972; 43024; 44501; 44814; 44913; 44927; 45000; 46414; 47041; 48051; 48052; 50166; 50311; 50560; 50641; 51112; 51442; 51443; 51482; 51999; 52057; 52114; 52129; 52672; 52851; 54183; 54507; 54680; 54725; 54847; 55444; 56252; 56634; 56979; 57395; 57544; 57856; 59161; 59312; 59778; 60242; 60380; 61229; 61254; 62221; 62331; 63951; 64827; 64850; 65132; 65176; 65763; 65906; 66407; 66409; 66706; 66710; 66952; 67078; 69392; 69657; 69716; 69720; 69721; 69758; 69850; 69929; 70575; 70718; 71461; 71635; 71663; 71917; 72717; 72759; 72972; 73668; 73751; 74209; 74577; 74578; 74593; 74850; 75508; 76120; 76266; 100048; 100300; 100428; 125100; 190494; 193464; 193498

---
